# Supplementary material for: Uropathogenic Escherichia coli infection-induced epithelial trained immunity impacts urinary tract disease outcome
Source: PubMed Central journal article supplement (PMC10159856; doi:10.1038/s41564-023-01346-6), 2023-04-10

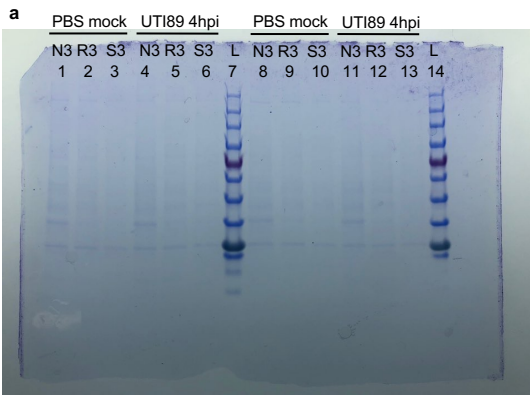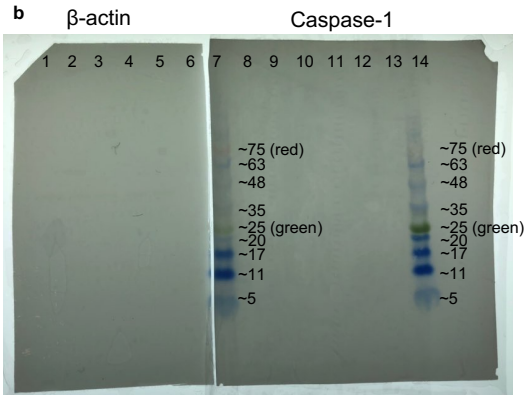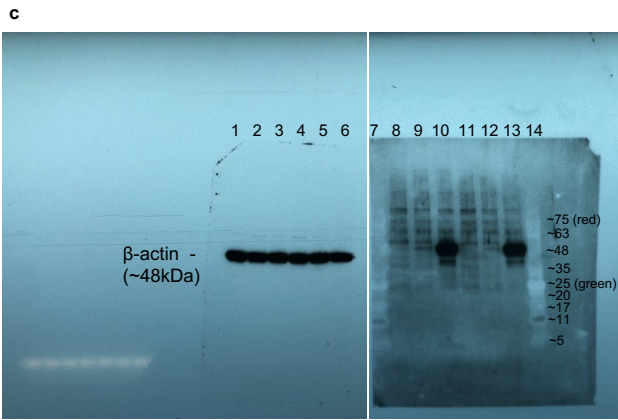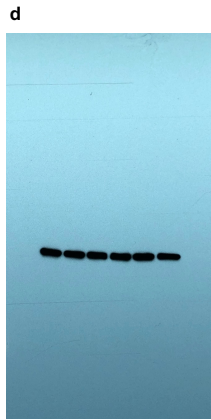

Supplement: 41564_2023_1346_MOESM8_ESM.pdf [file 41564_2023_1346_MOESM8_ESM.pdf]
